# Supplementary material for: Investigating the genetic regulation of the ECF sigma factor σS in Staphylococcus aureus
Source: PubMed Central journal article supplement (PMC4265319; doi:10.1186/s12866-014-0280-9), 2014-11-30
Supplement: 12866_2014_280_MOESM1_ESM.pdf [file 12866_2014_280_MOESM1_ESM.pdf]

**Supplemental Table S1. Primers Used to Confirm NTML Strains.**

| Primer | Description                             | Gene                     |
|--------|-----------------------------------------|--------------------------|
| OL338  | ATG GGA TCC GTT TCT GCT ATG TAC AAC     | Forward <i>brnQ3</i>     |
| OL339  | ATG GAA TTC CCT AGG AAA GCG AAG CCA TTC | Reverse <i>brnQ3</i>     |
| OL1573 | TAG CGC TGA CGA ATG AAA CTT             | Forward <i>sbcC</i>      |
| OL1574 | CAT CGC GTT TGC TTT ATT CAT C           | Reverse <i>sbcC</i>      |
| OL1633 | GAA GGT CAA GCT GTT GAG                 | Forward <i>msa</i>       |
| OL1634 | AAG CAT CAT ATA CAT ACC ACA CT          | Reverse <i>msa</i>       |
| OL1635 | CCG AAG TGC GAT GTT CAC TT              | Forward <i>msrA</i>      |
| OL1636 | TCC AAG TGC TAA GAG GTA TAC AG          | Reverse <i>msrA</i>      |
| OL1652 | GAA GTT GTG CAA GTG ATA CAT G           | Forward <i>sacol1602</i> |
| OL1653 | CGA CCG CTC TGT GCG ACT TGC TG          | Reverse <i>sacol1602</i> |
| OL1654 | GAG ACG GGA GAT TTC TAC GAG CC          | Forward <i>glpF</i>      |
| OL1655 | GAG CTT GTT GTT CCT TGG TC              | Reverse <i>glpF</i>      |
| OL1656 | CAA CAA GAT AAG GAG TGA AC              | Forward <i>ebh</i>       |
| OL1657 | GTG ATG TCA ATC GGT GCT CCT C           | Reverse <i>ebh</i>       |
| OL2074 | CAA GGT GCA TGG TTA TAT GTC             | Forward <i>sucB</i>      |
| OL2075 | CAG CAG TAA GAT ATT TCG ACT AGG         | Reverse <i>sucB</i>      |
| OL2089 | GAA CCA GGG TGA TGC ATA TCG             | Forward <i>ctpA</i>      |
| OL2090 | GGA GGC GTG TCA TTA AC                  | Reverse <i>ctpA</i>      |
| OL2469 | GTC GGT GAA GTA CTT GGA ACT GG          | Forward <i>hexA</i>      |
| OL2470 | CTG TAG CGC CTG CAT CTA TAG C           | Reverse <i>hexA</i>      |
| OL2471 | GGT GTA TCA CCA GCA AAT GCT CC          | Forward <i>tenA</i>      |
| OL2472 | GAT CAG TAC CTG CAA TGG TTA ATG C       | Reverse <i>tenA</i>      |
| OL2473 | CTG TTT ACG CAG CAT ATA CCG CAC         | Forward <i>femB</i>      |
| OL2474 | GCC TAT AGT ATC AAT AAC TAT AAG CC      | Reverse <i>femB</i>      |
| OL2475 | GTC AAC TAT CCT AAG CGG AG              | Forward <i>pbp2</i>      |
| OL2476 | CTG AGG ATT TTA TGT TGA GTG G           | Reverse <i>pbp2</i>      |
| OL2477 | CAT TGC GGG TCA AGA TGT ATC AG          | Forward <i>argJ</i>      |
| OL2478 | GAA CGA TAA TGG GGT AGA TGT TG          | Reverse <i>argJ</i>      |
| OL2479 | GTA CAC ATT AGC TGT GAC TAA TG          | Forward <i>sucA</i>      |
| OL2480 | GGA ACT TTA ACC TCT GGC ATG AC          | Reverse <i>sucA</i>      |
| OL2551 | GTC AAG GCG TAG ATA TCC TAT GTA AGG     | Forward <i>nupC</i>      |
| OL2552 | CAG ACA TAT TGT GCA TGT ATA TCA CC      | Reverse <i>nupC</i>      |
| OL2553 | TGG TGG TGG GTT TAT TGG                 | Forward <i>sacol0682</i> |
| OL2554 | CGT GCT AAT GCT AGA TGT                 | Reverse <i>sacol0682</i> |
| OL2555 | AGA TAA AGA TGG GGA GGA                 | Forward <i>sacol0684</i> |
| OL2556 | TAC ACT TAA CAC ACC CAC                 | Reverse <i>sacol0684</i> |
| OL2557 | GGT TGG AAA GGT TGG GTT                 | Forward <i>sacol0940</i> |
| OL2558 | GTA GTT GGT GAT TGT GCT G               | Reverse <i>sacol0940</i> |
| OL2559 | CCT CAT CTA AAC CTA TCG                 | Forward <i>sacol1349</i> |
| OL2560 | TCC CCT CTT TTC TCT ATT TC              | Reverse <i>sacol1349</i> |
| OL2561 | TTT GCC CGT TTC TCT ACT                 | Forward <i>rpmG</i>      |
| OL2562 | CTT CGT AAT CAC CTT TTG CT              | Reverse <i>rpmG</i>      |
| OL2563 | CGG TGT TGA AGA TAT TGG T               | Forward <i>sacol1392</i> |
| OL2564 | GCC ATT CCC TCT TTT TTG T               | Reverse <i>sacol1392</i> |
| OL2565 | AGA AGA TGG TAA GAA GGG                 | Forward <i>licT</i>      |
| OL2566 | AAG AGA CGA TGA TAG GTG                 | Reverse <i>licT</i>      |
| OL2567 | GTG AGA ATG ATG GCT TTG                 | Forward <i>sacol1412</i> |
| OL2568 | GGA TTA GAT GAA GAG GAA GA              | Reverse <i>sacol1412</i> |
| OL2569 | ACC CGG CAC AAA TTA CAA                 | Forward <i>opp2F</i>     |
| OL2570 | AAC GGG GTG AAT ATG ATG A               | Reverse <i>opp2F</i>     |
| OL2571 | CAA CCG GAG AGC AAC AAA                 | Forward <i>asd</i>       |
| OL2572 | GCC AAC ACC CTC AAA TAA A               | Reverse <i>asd</i>       |
| OL2573 | AAG GCA TCA CAT ATC CAG AA              | Forward <i>alr2</i>      |
| OL2574 | TAC CAA AGC CAC CAC CAA                 | Reverse <i>alr2</i>      |
| OL2575 | CAA CTC TAA TAG CAA CAC CA              | Forward <i>sacol1445</i> |
| OL2576 | CAC ACT CAA TAG CAA CCA                 | Reverse <i>sacol1445</i> |
| OL2577 | CCG CCA ACT AAT CCA GAA                 | Forward <i>sacol1447</i> |
| OL2578 | CAC AAA CAA CAC AAC AAG CA              | Reverse <i>sacol1447</i> |
| OL2579 | ATA GAA CAT CCC CCC CCA                 | Forward <i>sacol1452</i> |
| OL2580 | GAC CAA GAC CAA GCA GAA                 | Reverse <i>sacol1452</i> |
| OL2581 | TTG TTG TTT CGC TTG TGG T               | Forward <i>ald</i>       |
| OL2582 | GAT GGA TAT GCG GGT GTT                 | Reverse <i>ald</i>       |
| OL2583 | CAC ACC TTC TTC TTA CA C                | Forward <i>sacol1479</i> |
| OL2584 | CCA AAT CCT ACT ACA GCA                 | Reverse <i>sacol1479</i> |

|        |                            |                         |
|--------|----------------------------|-------------------------|
| OL2585 | ATC CCA ACA TAC AGC TAC A  | Forward <i>sacI1480</i> |
| OL2586 | AAC GAA CCA AAG GGG AAA    | Reverse <i>sacI1480</i> |
| OL2587 | CCA CCA GAA ACG CCC ATA    | Forward <i>pepT2</i>    |
| OL2588 | TGC CAA CAA CAC ACA AAG    | Reverse <i>pepT2</i>    |
| OL2589 | AAC CGC CAC CAG AAA TAA    | Forward <i>sacI1556</i> |
| OL2590 | TGC CAA CAA CAC ACA AAG    | Reverse <i>sacI1556</i> |
| OL2591 | CCG CAA AAT CCC CAT CAA    | Forward <i>sacI1620</i> |
| OL2592 | CCA TAA CTC ACC CCA ACC    | Reverse <i>sacI1620</i> |
| OL2593 | ACC CCT CCT AAA AAC CAA    | Forward <i>ribD</i>     |
| OL2594 | CAA ATC CAA TGC CTC CAA    | Reverse <i>ribD</i>     |
| OL2735 | GAA AAA TAG CTA AGG GGA GT | Forward <i>sacI0722</i> |
| OL2736 | TGC TTT GTC TTG GTC ATT C  | Reverse <i>sacI0722</i> |
| OL2737 | ACC TCA TCC GCC AAT TAA A  | Forward <i>isdB</i>     |
| OL2738 | CAT CGT CAC ACT CAT AAC T  | Reverse <i>isdB</i>     |
| OL2739 | CAA CGG AGG GGT AAA TCA    | Forward <i>pepA3</i>    |
| OL2740 | AAG ACA CCA CAT AAC GCA    | Reverse <i>pepA3</i>    |
| OL2741 | CTA ATA GGT GAG GCG CTT    | Forward <i>trpF</i>     |
| OL2742 | GTC TGC TTT TGC CTC TTT    | Reverse <i>trpF</i>     |
| OL2743 | CAA TAG CAG TCA GTT TCA AG | Forward <i>pepF2</i>    |
| OL2744 | CAG CAA GAC ATT TAG AAC G  | Reverse <i>pepF2</i>    |
| OL2745 | CAT AGA TGG TGT TGA AGA AG | Forward <i>pstC</i>     |
| OL2746 | GGG AGT AAT AGA AAG AGG T  | Reverse <i>pstC</i>     |
| OL2747 | AAC CTC TTT CTA TTA CTC CC | Forward <i>pstS</i>     |
| OL2748 | CCC AGC CAT TTT TGT ATT C  | Reverse <i>pstS</i>     |
| OL2749 | CCT GCG CCA AAA AAC ATA    | Forward <i>norD</i>     |
| OL2750 | GGA AGA TGA ACG TGA ACA A  | Reverse <i>norD</i>     |
| OL2751 | CCA TCT CTA TTT GCC TCC    | Forward <i>sacI1476</i> |
| OL2752 | AAG GGT GTG GTA GGT TAA A  | Reverse <i>sacI1476</i> |
| OL2753 | AAA CAT AGC TCA TCA CCC    | Forward <i>sacI1531</i> |
| OL2754 | CAA TCT GCC TCT CTA ATA C  | Reverse <i>sacI1531</i> |
| OL2755 | GGC CCC GGA CTA TAA TTG A  | Forward <i>sacI1947</i> |
| OL2756 | GGC CCC AAC AAA GAG AAA    | Reverse <i>sacI1947</i> |
| OL2757 | CCG AGA ATC TTT AAC ACC A  | Forward <i>ilvB</i>     |
| OL2758 | ACA AGG TCG TAG CAT TCA    | Reverse <i>ilvB</i>     |
| OL2759 | ATT GAT GTT CGT CCG GTT    | Forward <i>hmrA</i>     |
| OL2760 | GAG TGT AGG GTA AAA GGG AG | Reverse <i>hmrA</i>     |
| OL2761 | GGG GAA ATA TGT AAA CGA AC | Forward <i>sacI2143</i> |
| OL2762 | GGC CAA AGT ATT CAA CAA G  | Reverse <i>sacI2143</i> |
| OL2763 | AAG ACC GTG ATG AGA AGA    | Forward <i>rocF</i>     |
| OL2764 | ACA TAG AGC AAA GGG GGA    | Reverse <i>rocF</i>     |

**Supplemental Table S2. Proteins identified as binding to the *sigS* promoter region in a biotin pull down assay.**

| <b>Accession #</b> | <b>Gene</b> | <b>Function</b>                                              |
|--------------------|-------------|--------------------------------------------------------------|
| SACOL0009          | <i>serS</i> | Seryl-tRNA synthetase                                        |
| SACOL0435          | <i>ychF</i> | GTP-binding protein                                          |
| SACOL0476          | <i>hsdM</i> | Type I restriction-modification system M subunit             |
| SACOL0477          |             | Putative restriction/modification system specificity protein |
| SACOL0562          | <i>lysS</i> | Lysyl-tRNA synthetase                                        |
| SACOL0570          | <i>clpC</i> | ATP-dependent Clp Protease ATP-binding subunit               |
| SACOL0588          | <i>rpoB</i> | DNA-directed RNA polymerase subunit beta                     |
| SACOL0589          | <i>rpoC</i> | DNA-directed RNA polymerase subunit beta'                    |
| SACOL0793          |             | Ribonucleoside-diphosphate reductase, beta subunit           |
| SACOL1215          | <i>carB</i> | Carbamoyl-phosphate synthase large chain                     |
| SACOL1267          | <i>topA</i> | DNA topoisomerase 1                                          |
| SACOL1271          | <i>hslU</i> | ATP-dependent protease ATPase subunit                        |
| SACOL1390          | <i>parC</i> | DNA topoisomerase IV, subunit A                              |
| SACOL1494          | <i>asnS</i> | Asparaginyl-tRNA synthetase                                  |
| SACOL1614          | <i>nfo</i>  | Probable endonuclease 4                                      |
| SACOL1681          | <i>cymR</i> | Rrf2 family protein                                          |
| SACOL1729          | <i>thrS</i> | Threonyl-tRNA synthetase                                     |
| SACOL1737          | <i>polA</i> | DNA polymerase I                                             |
| SACOL1759          |             | Putative universal stress protein                            |
| SACOL1790          | <i>murC</i> | UDP-N-acetylmuramate-L-alanine ligase                        |
| SACOL2213          | <i>rpoA</i> | DNA-directed RNA polymerase subunit alpha                    |

Supplemental Table S3. Tn551 Insertions Resulting in Increased Expression of *sigS*.

| Accession Number                                                 | NE Number <sup>a</sup> | Tn551 Insertion Site                                                                                  | Gene                  | Hits <sup>b</sup> | Unique <sup>c</sup> |
|------------------------------------------------------------------|------------------------|-------------------------------------------------------------------------------------------------------|-----------------------|-------------------|---------------------|
| <b>DNA metabolism: DNA replication, recombination and repair</b> |                        |                                                                                                       |                       |                   |                     |
| SACOL0566                                                        | NE544                  | Nucleoside permease                                                                                   | <i>nupC</i>           | 1                 | 1                   |
| SACOL1315                                                        | NE974                  | DNA mismatch repair protein                                                                           | <i>hexA</i>           | 1                 | 1                   |
| SACOL1382                                                        | NE1451                 | Exonuclease                                                                                           | <i>sbcDC</i>          | 3                 | 2                   |
| SACOL1413                                                        | N/A                    | Hypothetical protein (putative helicase)                                                              |                       | 1                 | 1                   |
| SACOL1479                                                        | NE789                  | Putative, 5'-3' exonuclease                                                                           |                       | 2                 | 1                   |
| <b>Regulators</b>                                                |                        |                                                                                                       |                       |                   |                     |
| SACOL0513                                                        | NE1883                 | Transcriptional regulatory protein                                                                    | <i>glcT</i>           | 1                 | 1                   |
| SACOL1136                                                        | N/A                    | Hypothetical Protein (nucleic acid binding domain)                                                    |                       | 1                 | 1                   |
| SACOL1393                                                        | NE1415                 | Transcriptional antiterminator LicT, putative                                                         | <i>licT</i>           | 3                 | 1                   |
| SACOL1451                                                        | NE1684                 | Response regulator                                                                                    | <i>arlR</i>           | 1                 | 1                   |
| SACOL1436                                                        | NE9                    | Modulator of SarA                                                                                     | <i>Msa</i>            | 1                 | 1                   |
| SACOL2086                                                        | NE1218                 | Transcriptional regulator, TenA family                                                                | <i>tenA</i>           | 1                 | 1                   |
| SACOL2188                                                        | NE436                  | Lactose phosphotransferase system repressor                                                           | <i>lacR</i>           | 5                 | 1                   |
| <b>Toxin production and resistance</b>                           |                        |                                                                                                       |                       |                   |                     |
| SACOL1441                                                        | N/A                    | Tellurite resistance protein, putative                                                                |                       | 3                 | 1                   |
| <b>Cell envelope associated</b>                                  |                        |                                                                                                       |                       |                   |                     |
| SACOL1411                                                        | N/A                    | Aminoacyltransferase                                                                                  | <i>femB</i>           | 1                 | 1                   |
| SACOL1472                                                        | NE1                    | Cell wall associated fibronectin-binding protein                                                      | <i>ebh</i>            | 6                 | 2                   |
| <b>Transporters</b>                                              |                        |                                                                                                       |                       |                   |                     |
| SACOL0682                                                        | NE1139                 | Putative antiporter                                                                                   |                       | 1                 | 1                   |
| SACOL0684                                                        | NE1292                 | Na <sup>+</sup> /H <sup>+</sup> antiporter, MnhE component, putative                                  |                       | 2                 | 1                   |
| SACOL0993                                                        | NE1633                 | Oligopeptide ABC transporter, ATP-binding protein                                                     | <i>oppD2</i>          | 1                 | 1                   |
| SACOL1319                                                        | NE1580                 | Glycerol uptake facilitator protein                                                                   | <i>glpF</i>           | 5                 | 1                   |
| SACOL1392                                                        | NE142                  | Sodium:alanine symporter family protein                                                               |                       | 3                 | 1                   |
| SACOL1414                                                        | NE1609                 | Peptide ABC transporter, ATP-binding protein                                                          | <i>opp2F</i>          | 4                 | 1                   |
| SACOL1416                                                        | N/A                    | Peptide ABC-transporter, permease protein, putative                                                   |                       | 1                 | 1                   |
| SAACOL1443                                                       | NE44                   | Branched-chain amino acid transport system II carrier protein                                         | <i>brnQ3</i>          | 3                 | 1                   |
| <b>Amino acid biosynthesis</b>                                   |                        |                                                                                                       |                       |                   |                     |
| SACOL1680                                                        | NE595                  | Glutamate N-acetyltransferase/amino-acid acetyltransferase                                            | <i>argJ</i>           | 2                 | 1                   |
| SACOL1439                                                        | NE809                  | Hypothetical protein (Aspartate aminotransferase superfamily)                                         |                       | 1                 | 1                   |
| SACOL1429                                                        | NE1144                 | Aspartate-semialdehyde dehydrogenase                                                                  | <i>asd</i>            | 1                 | 1                   |
| SACOL1434                                                        | NE799                  | Alanine racemase family protein/diaminopimelate decarboxylase                                         | <i>alr2</i>           | 1                 | 1                   |
| SACOL1448                                                        | NE1391                 | Dihydroipoamide succinyltransferase                                                                   | <i>sucB</i>           | 1                 | 1                   |
| SACOL1449                                                        | NE547                  | 2-Oxoglutarate dehydrogenase, E1 component                                                            | <i>sucA</i>           | 3                 | 1                   |
| SACOL1478                                                        | NE1136                 | Alanine dehydrogenase                                                                                 | <i>ald</i>            | 1                 | 1                   |
| SACOL2045                                                        | NE1177                 | Ketol-acid reductoisomerase                                                                           |                       | 1                 | 1                   |
| <b>Protein synthesis and modification</b>                        |                        |                                                                                                       |                       |                   |                     |
| SACOL1369                                                        | NE1904                 | 50S ribosomal protein l33                                                                             | <i>rpmG</i>           | 4                 | 1                   |
| SACOL1397                                                        | NE1813                 | Peptide methionine sulfoxide reductase                                                                | <i>msrA</i>           | 4                 | 1                   |
| SACOL1455                                                        | NE847                  | Carboxyl-terminal protease                                                                            | <i>ctpA</i>           | 1                 | 1                   |
| SACOL1480                                                        | NE582                  | Hypothetical protein (ribosome associated GTPase domain)                                              |                       | 1                 | 1                   |
| <b>Unknown function</b>                                          |                        |                                                                                                       |                       |                   |                     |
| SACOL1452                                                        | NE577                  | PAP2 family protein                                                                                   |                       | 1                 | 1                   |
| SACOL1602                                                        | NE377                  | Metallo-β-lactamase family protein                                                                    |                       | 1                 | 1                   |
| <b>Hypothetical proteins</b>                                     |                        |                                                                                                       |                       |                   |                     |
| SACOL0940                                                        | NE1505                 | Hypothetical protein (No conserved domains)                                                           |                       | 1                 | 1                   |
| SACOL1469                                                        | N/A                    | Hypothetical protein (No conserved domains)                                                           |                       | 1                 | 1                   |
| SACOL1556                                                        | NE1346                 | Hypothetical protein (No conserved domains)                                                           |                       | 1                 | 1                   |
| SACOL2642                                                        | N/A                    | Hypothetical protein (No conserved domains)                                                           |                       | 1                 | 1                   |
| <b>INTERGENIC</b>                                                |                        |                                                                                                       |                       |                   |                     |
| SACOLL1369/<br>SACOL1370                                         | N/A                    | 50S ribosomal protein L33/30S ribosomal protein S14                                                   | <i>rpmG/</i>          | 1                 | 1                   |
| SACOL1396/<br>SACOL1397                                          | N/A                    | <i>fmtC</i> protein/peptide methionine sulfoxide reductase                                            | <i>fmtC/<br/>msrA</i> | 1                 | 1                   |
| SACOL1412/<br>SACOL1413                                          | N/A                    | Hydrolase-related protein/hypothetical protein (putative helicase)                                    |                       | 2                 | 1                   |
| SACOL1442/<br>SACOL1443                                          | N/A                    | IS1272-related, transposase, degenerate/Branched-chain amino acid transport system II carrier protein | <i>/brnQ3</i>         | 2                 | 1                   |
| SACOL1445/                                                       | N/A                    | CbbQ/NirQ/NorQ/GpvN family protein/ Conserved                                                         |                       | 1                 | 1                   |

|                         |     |                                                                        |                       |   |   |
|-------------------------|-----|------------------------------------------------------------------------|-----------------------|---|---|
| SACOL1446               |     | hypothetical protein                                                   |                       |   |   |
| SACOL1447/<br>SACOL1448 | N/A | Conserved hypothetical protein/dihydroipoamide<br>acyltransferase      |                       | 1 | 1 |
| SACOL1449/<br>SACOL1450 | N/A | 2-oxoglutarate dehydrogenase, E1 component/Sensor<br>histidine kinase  | <i>sucA/<br/>arlS</i> | 2 | 1 |
| SACOL1451/<br>SACOL1452 | N/A | DNA-binding response regulator ArlR/PAP2 family protein                | <i>arlR/</i>          | 1 | 1 |
| SACOL1555/<br>SACOL1556 | N/A | Peptidase, M20/M25/M40 family/hypothetical protein                     | <i>pepT2/</i>         | 1 | 1 |
| SACOL1620/<br>SACOL1621 | N/A | Conserved hypothetical protein/CBS domain protein                      |                       | 1 | 1 |
| SACOL1820/<br>SACOL1821 | N/A | Riboflavin biosynthesis protein RibD/Conserved<br>hypothetical protein | <i>ribD/</i>          | 1 | 1 |
| SACOL1893/<br>SACOL1894 | N/A | ABC transporter, ATP-binding protein/HIT family protein                |                       | 1 | 1 |

<sup>a</sup>NE numbers are the identification number in the Nebraska Transposon Mutant Library.

<sup>b</sup>Hits refer to the total number of Tn551 insertion sites identified for a particular gene.

<sup>c</sup>The unique number of insertions sites refers to those insertions that are a result of distinctive insertion events.

N/A means there was no NTML strain for this gene

Supplemental Table S4. Tn551 Insertions Resulting in Decreased Expression of *sigS*.

| Accession Number                          | NE Number <sup>a</sup> | Tn551 Insertion Site                                                                 | Gene                          | Hits <sup>b</sup> | Unique <sup>c</sup> |
|-------------------------------------------|------------------------|--------------------------------------------------------------------------------------|-------------------------------|-------------------|---------------------|
| <b>Regulators</b>                         |                        |                                                                                      |                               |                   |                     |
| SACOL1393                                 | NE1415                 | Transcriptional antiterminator, <i>licT</i> putative                                 | <i>licT</i>                   | 3                 | 1                   |
| SACOL1398                                 | N/A                    | Transcriptional regulator, putative                                                  |                               | 1                 | 1                   |
| <b>Cell Envelope Associated</b>           |                        |                                                                                      |                               |                   |                     |
| SACOL1138                                 | NE1102                 | LPXTG cell wall surface anchor protein                                               | <i>isdB</i>                   | 1                 | 1                   |
| SACOL1531                                 | NE707                  | Lipoprotein, putative                                                                |                               | 1                 | 1                   |
| <b>Transporters</b>                       |                        |                                                                                      |                               |                   |                     |
| SACOL0722                                 | NE187                  | Phosphate transporter family protein                                                 |                               | 1                 | 1                   |
| SACOL1424                                 | NE1459                 | Phosphate ABC transporter, phosphate binding protein                                 | <i>pstS</i>                   | 2                 | 1                   |
| SACOL1443                                 | NE44                   | Branched chain amino acid transport system II carrier protein                        | <i>brnQ3</i>                  | 7                 | 1                   |
| SACOL1476                                 | NE211                  | Amino acid permease                                                                  |                               | 1                 | 1                   |
| <b>Amino Acid Biosynthesis</b>            |                        |                                                                                      |                               |                   |                     |
| SACOL1407                                 | NE1215                 | 5'Phosphoribosyl anthranilate isomerase                                              | <i>trpF</i>                   | 1                 | 1                   |
| SACOL2043                                 | NE1166                 | Acetolactate synthase, large subunit                                                 | <i>ilvB</i>                   | 1                 | 1                   |
| SACOL2154                                 | NE134                  | Arginase                                                                             | <i>rocF</i>                   | 1                 | 1                   |
| <b>Protein Synthesis and Modification</b> |                        |                                                                                      |                               |                   |                     |
| SACOL1402                                 | NE1306                 | Glutamyl aminopeptidase, putative                                                    | <i>pepA3</i>                  | 1                 | 1                   |
| SACOL1419                                 | NE195                  | Oligoendopeptidase F, putative                                                       | <i>pepF2</i>                  | 1                 | 1                   |
| SACOL2125                                 | NE600                  | Peptidase, M20/M25/M40 family protein                                                | <i>hmrA</i>                   | 1                 | 1                   |
| <b>Unknown Function</b>                   |                        |                                                                                      |                               |                   |                     |
| SACOL1412                                 | NE1611                 | Hydrolase-related protein                                                            |                               | 2                 | 1                   |
| SACOL1452                                 | NE577                  | PAP2 family protein                                                                  |                               | 1                 | 1                   |
| <b>Hypothetical Proteins</b>              |                        |                                                                                      |                               |                   |                     |
| SACOL1344                                 | N/A                    | Hypothetical protein                                                                 |                               | 3                 | 2                   |
| SACOL1418                                 | N/A                    | Conserved hypothetical protein                                                       |                               | 1                 | 1                   |
| SACOL1444                                 | NE143                  | Conserved hypothetical protein                                                       |                               | 3                 | 2                   |
| SACOL1947                                 | NE1706                 | Conserved hypothetical protein                                                       |                               | 3                 | 1                   |
| SACOL2143                                 | NE1104                 | Conserved hypothetical protein                                                       |                               | 2                 | 1                   |
| <b>INTERGENIC</b>                         |                        |                                                                                      |                               |                   |                     |
| SACOL0610/<br>SACOL0611                   | N/A                    | SdrE protein/glycosyl transferase, group 1 family protein                            | <i>sdrE/</i>                  | 1                 | 1                   |
| SACOL1348/<br>SACOL1349                   | N/A                    | Conserved hypothetical protein/conserved hypothetical protein                        |                               | 1                 | 1                   |
| SACOL1369/<br>SACOL1370                   | N/A                    | Ribosomal protein L33/ribosomal protein S14                                          | <i>rpmG1/</i><br><i>rpsN1</i> | 1                 | 1                   |
| SACOL1398/<br>SACOL1399                   | N/A                    | Transcriptional regulator, putative/ 4-oxalocrotonate tautomerase                    | <i>/dmpl</i>                  | 1                 | 1                   |
| SACOL1407/<br>SACOL1408                   | N/A                    | 5'Phosphoribosyl anthranilate isomerase/tryptophan synthase, beta subunit            | <i>trpF/tr</i><br><i>pB</i>   | 1                 | 1                   |
| SACOL1411/<br>SACOL1412                   |                        | FemB protein/hydrolase related protein                                               | <i>femB/</i>                  | 1                 | 1                   |
| SACOL1441/<br>SACOL1442                   | N/A                    | Tellurite resistance protein, putative/ IS1272-related transposase                   |                               | 1                 | 1                   |
| SACOL1443/<br>SACOL1444                   | N/A                    | Branched-chain amino acid transport system II protein/Conserved hypothetical protein | <i>brnQ3/</i>                 | 1                 | 1                   |
| SACOL1447/<br>SACOL1448                   | N/A                    | Conserved hypothetical protein/2-oxoglutarate dehydrogenase, E2 component            | <i>/sucB</i>                  | 1                 | 1                   |
| SACOL1468/<br>SACOL1469                   | N/A                    | Membrane protein, putative/hypothetical protein                                      |                               | 1                 | 1                   |
| SACOL1711/<br>SACOL1712                   | N/A                    | DNA 3-methyladenine glycosylase /arbB protein putative                               |                               | 1                 | 1                   |
| SACOL1913/<br>SACOL1914                   | N/A                    | RNA methyltransferase/Iron-sulfur cluster, binding protein                           |                               | 1                 | 1                   |

<sup>a</sup>NE numbers are the identification number in the Nebraska Transposon Mutant Library.

<sup>b</sup>Hits refer to the total number of Tn551 insertion sites identified for a particular gene.

<sup>c</sup>The unique number of insertions sites refers to those insertions that are a result of distinctive insertion events.

N/A means there was no NTML strain for this gene
